# Supplementary material for: Evaluation of bacterial glycerol dialkyl glycerol tetraether and 2 H- 18 O biomarker proxies along a Central European topsoil transect
Source: Copernicus journal article supplement (doi:10.5194/bg-2019-197), 2019-05-29
Supplement: Supplementary file 1 [file bg-2019-197-supplement.pdf]

1 **Supplementary figures**

2

3

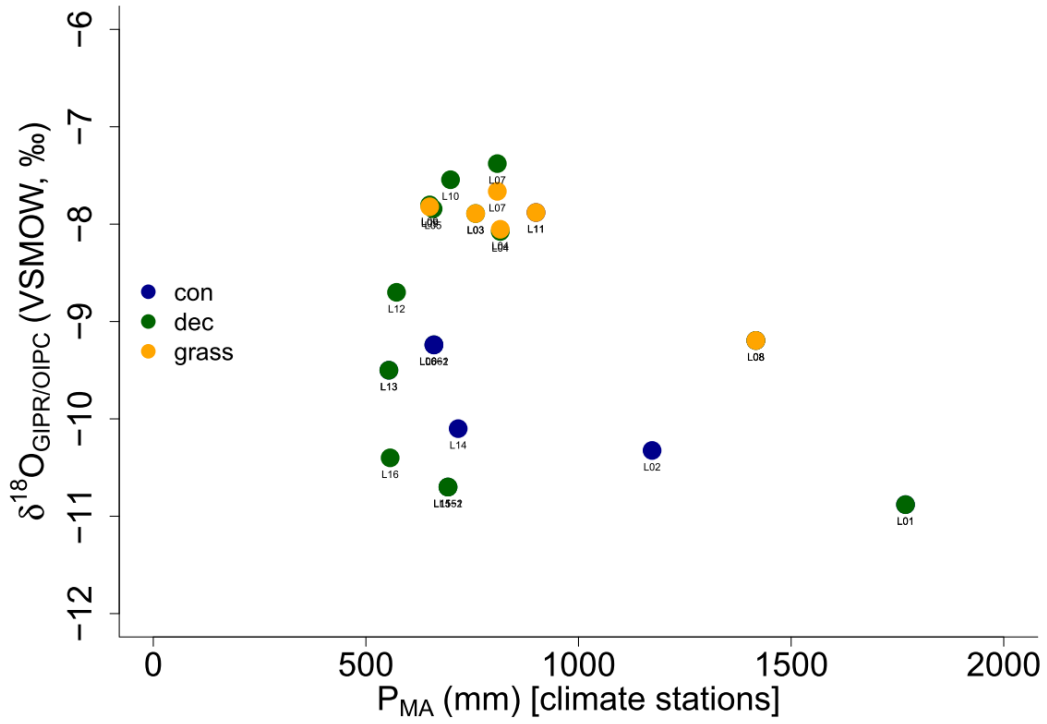

4

5 **Fig. S1.** Comparison between  $\delta^{18}\text{O}_{\text{GIPR/OIPC}}$  values vs.  $P_{\text{MA}}$  for the three different vegetation  
6 types along the transect. All data points are marked with the location names. Abbreviations:  
7 con = coniferous forest sites (n=9); dec = deciduous forest sites (n=11); grass = grassland sites  
8 (n=4).

9

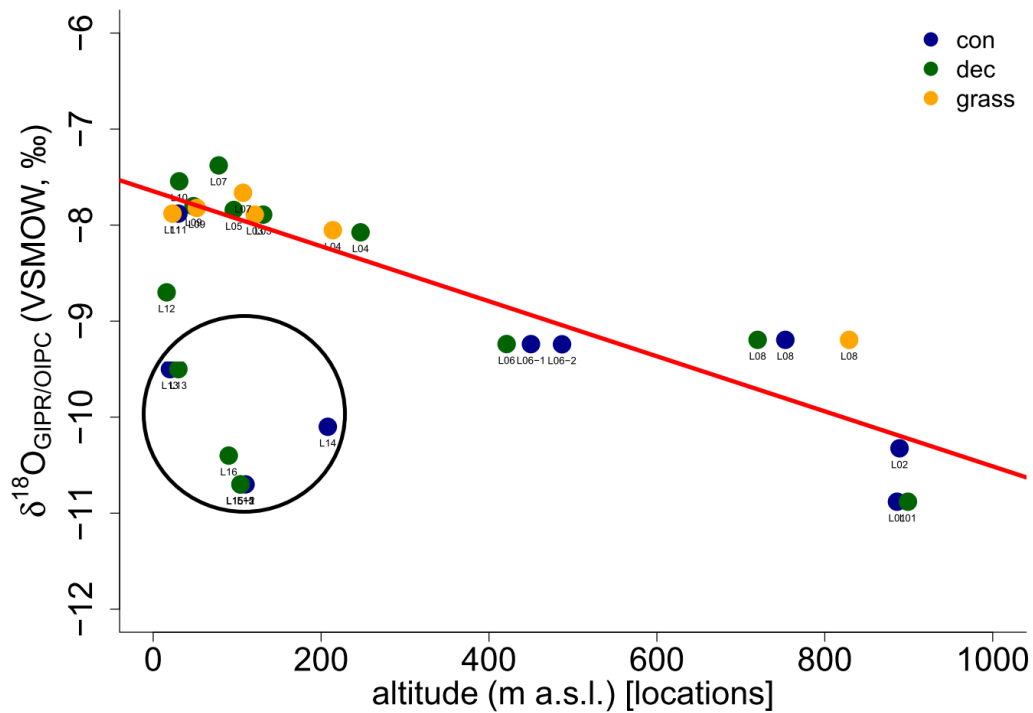

10

11 **Fig. S2.** Comparison between  $\delta^{18}\text{O}_{\text{GIPR/OIPC}}$  values vs. location altitudes for the three different  
 12 vegetation types along the transect. The red line represents the regression line throughout all  
 13 German sites. All data points are marked with the location names. Swedish and Danish sites are  
 14 boarded in black. Abbreviations: con = coniferous forest sites (n=9); dec = deciduous forest  
 15 sites (n=11); grass = grassland sites (n=4).

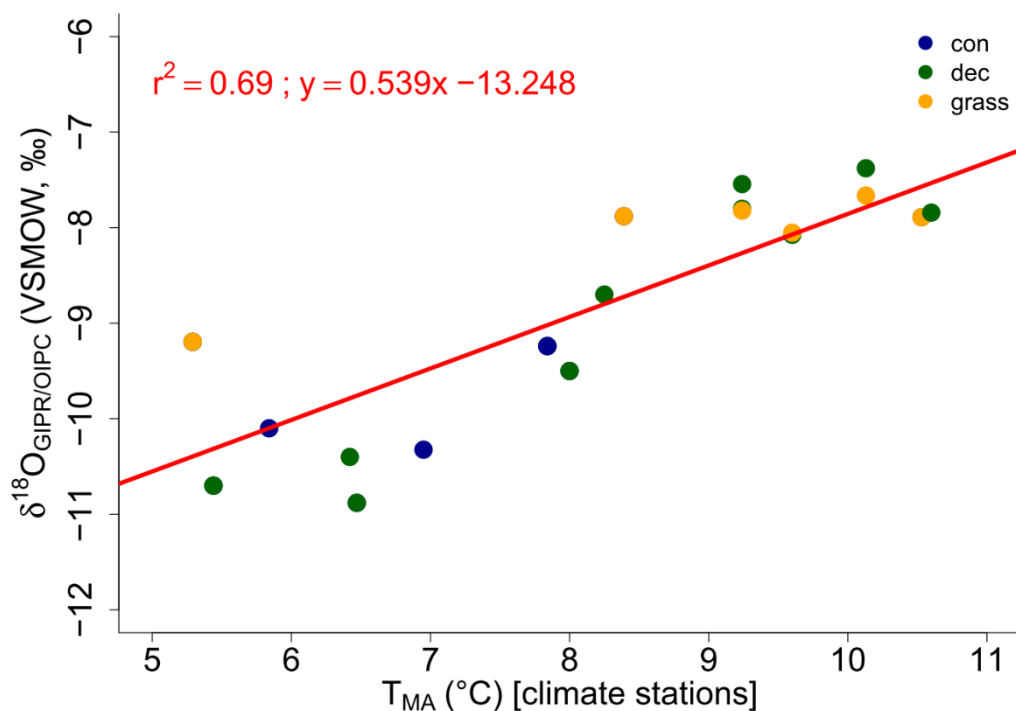

16 **Fig. S3.** Comparison between  $\delta^{18}\text{O}_{\text{GIPR/OIPC}}$  values vs.  $T_{\text{MA}}$  for the three different vegetation  
 17 types along the transect. The red line represents the regression line throughout all sites.  
 18 Abbreviations: con = coniferous forest sites (n=9); dec = deciduous forest sites (n=11); grass =  
 19 grassland sites (n=4).

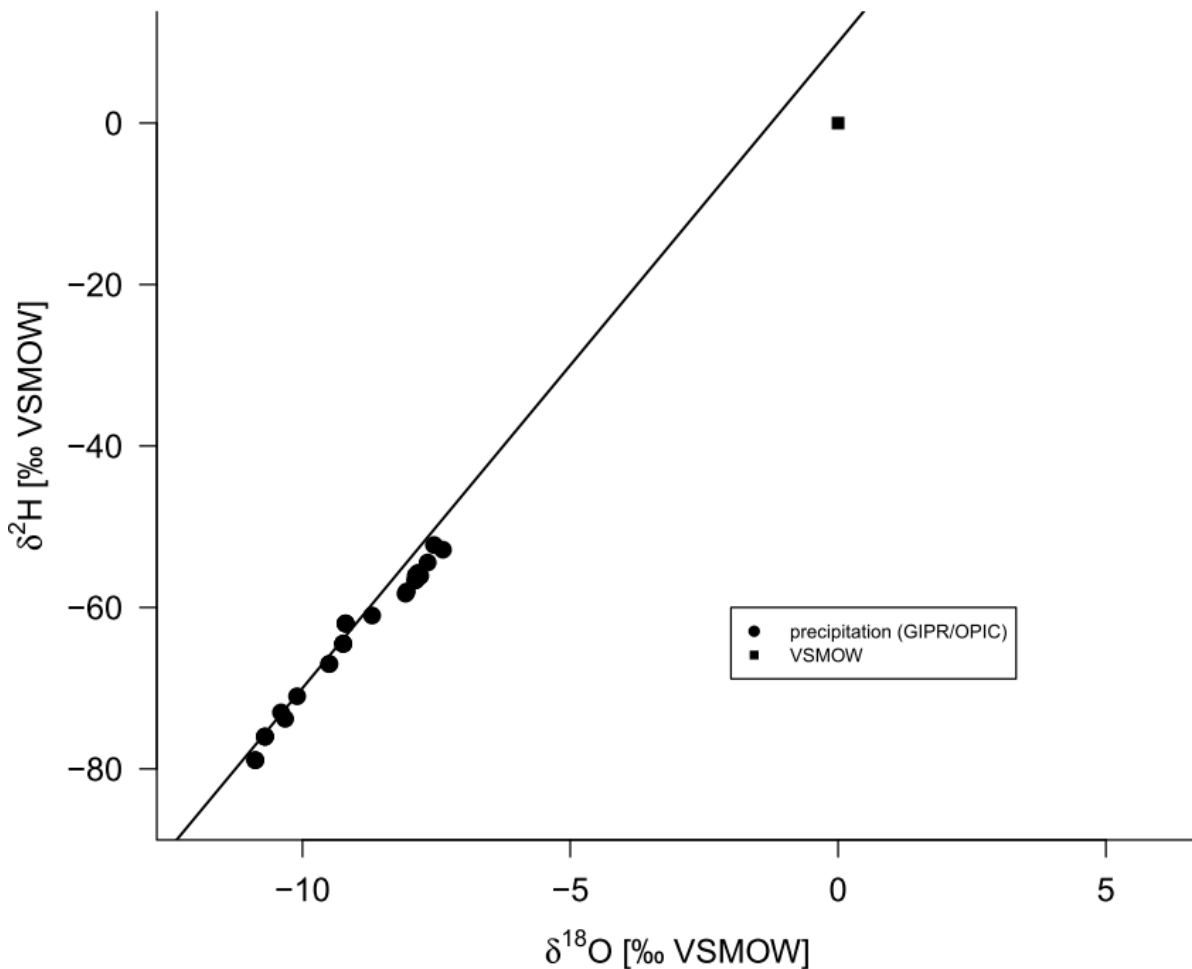

20 **Fig. S4.**  $\delta^2\text{H}_{\text{GIPR/OIPC}}$  vs.  $\delta^{18}\text{O}_{\text{GIPR/OIPC}}$  diagram along the transect. The black line represents the  
 21 global meteoric water line (GMWL;  $\delta^2\text{H} = 8 \times \delta^{18}\text{O} + 10$ ; Dansgaard, 1964).

22

23 Based on the values quoted in the Tabs. S1 and S2,  $\delta^{18}\text{O}$  is plotted as functions of the reported  
 24 environmental parameters (climate station  $P_{\text{MA}}$ , location altitude and  $T_{\text{MA}}$ ; Figs. S1 to S3).

25 It is worth to note that the five points representing Danish and Swedish sites (L12 to L16) form  
 26 a separate group in Figs. S2 and S3, with clear more negative  $\delta^{18}\text{O}$  values. All other  
 27 (continental) sites show a regular altitude effect (decreasing  $\delta^{18}\text{O}$  values with increasing  
 28 altitude; red trend in Fig. S3). All Danish and Swedish isotope signatures of precipitation are  
 29 shifted from the trend line by ca 2 to 2.5‰ towards more negative  $\delta^{18}\text{O}$  values. One would  
 30 rather expect more enriched values due to relative proximity to the sea. It should be noted that  
 31 those values were derived from OIPC, while the  $\delta^{18}\text{O}$  data for the German sites is derived from  
 32 GNIP/ANIP data (see section 2.2 for more details).

33 The precipitation  $\delta^{18}\text{O}$  shows the expected relationship with  $T_{\text{MA}}$  (Fig. S4). The slope of this  
 34 relationship (ca. 0.54‰/°C) is in the range of the slope of  $\delta$ -T spatial relationship observed at  
 35 mid latitudes of the northern hemisphere (e.g. Rozanski et al., 1993).

36 It is apparent from the above Fig. S5 that the data points plot along the GMWL. Only more  
 37 positive  $\delta^{18}\text{O}$  values cluster below the line, indicating most probably some evaporation

38 enrichment effects (partial evaporation of raindrops and/or evaporation effects in the rain  
39 gauges).

40

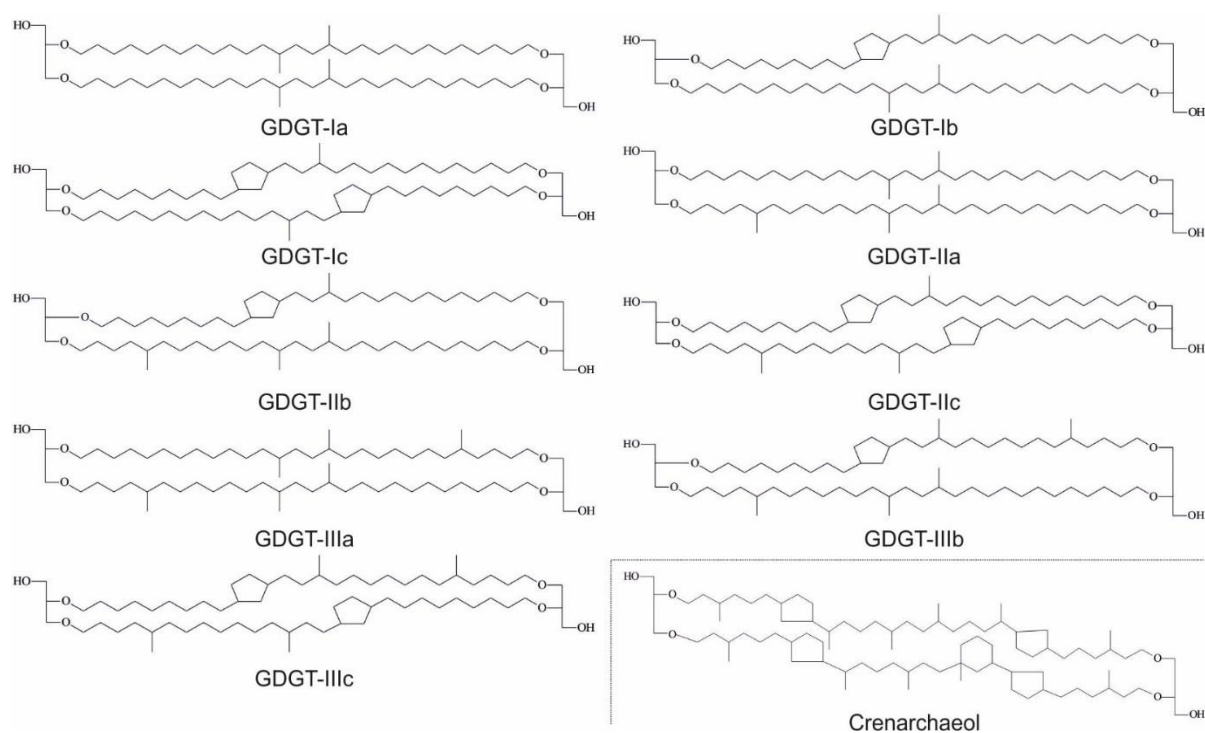

41 **Fig. S5.** Structures of brGDGTs and Crenarchaeol mentioned.

42

### 43 **Literature**

44 Dansgaard, W.: Stable isotopes in precipitation, *Tellus*, 16(4), 436–468, doi:10.1111/j.2153-  
45 3490.1964.tb00181.x, 1964.

46 Rozanski, K., Araguás-Araguás, L. and Gonfiantini, R.: Isotopic patterns in modern global  
47 precipitation, *Climate change in continental isotopic records*, 1–36, 1993.

48 **Supplementary data**

49 **Tab. S1. Location characterization, GIPR and OIPC data.**

| Location | Vegetation | Characterization                                                                | Precipitation $\delta^2\text{H}$ (%) | Precipitation $\delta^{18}\text{O}$ source (%) |
|----------|------------|---------------------------------------------------------------------------------|--------------------------------------|------------------------------------------------|
| L01      | con        | spruce forest, steep hillside                                                   | -78.9                                | -10.9                                          |
| L01      | dec        | beech forest, close to fir stand                                                | -78.9                                | -10.9                                          |
| L02      | con        | fir forest                                                                      | -73.8                                | -10.3                                          |
| L03      | dec        | beeches, oaks, limes, sparse pines                                              | -56.6                                | -7.9                                           |
| L03      | grass      | glade, next to farmland and fruit trees (apple, plum)                           | -56.6                                | -7.9                                           |
| L04      | dec        | beech forest, sparse firs and oaks                                              | -58.3                                | -8.1                                           |
| L04      | grass      | grassland in the valley, next to beech forest                                   | -58.0                                | -8.1                                           |
| L05      | dec        | oak forest, sparse beeches, elms and pines                                      | -55.7                                | -7.8                                           |
| L06      | dec        | beech forest, steep hillside                                                    | -64.5                                | -9.2                                           |
| L06-1    | con1       | sparse pine forest with grass layer                                             | -64.5                                | -9.2                                           |
| L06-2    | con2       | sparse larch forest with grass layer                                            | -64.5                                | -9.2                                           |
| L07      | dec        | beeches, acers, elms, oaks                                                      | -52.8                                | -7.4                                           |
| L07      | grass      | heath                                                                           | -54.4                                | -7.7                                           |
| L08      | con        | luxuriant spruce forest                                                         | -62.0                                | -9.2                                           |
| L08      | dec        | young beech forest at hillside, close to spruce stand                           | -62.0                                | -9.2                                           |
| L08      | grass      | heath, small shrubs, close to spruce stand, initially cleared                   | -62.0                                | -9.2                                           |
| L09      | dec        | birch forest with small oaks, sparse poplars, surrounded by farmland            | -56.1                                | -7.8                                           |
| L09      | grass      | next to farm track                                                              | -56.2                                | -7.8                                           |
| L10      | dec        | beech-oak-forest                                                                | -52.3                                | -7.5                                           |
| L11      | con        | spruce forest with larches                                                      | -56.0                                | -7.9                                           |
| L11      | grass      | cow pasture, sparse oaks                                                        | -56.0                                | -7.9                                           |
| L12      | dec        | acer forest with poplars, ashes and elder                                       | -61.0                                | -8.7                                           |
| L13      | con        | fir forest with swampy underground                                              | -67.0                                | -9.5                                           |
| L13      | dec        | beech forest with sparse acers, birches, loamy underground                      | -67.0                                | -9.5                                           |
| L14      | con        | spruce-pine-forest with moss layer                                              | -71.0                                | -10.1                                          |
| L15      | con        | spruce forest, sparse birches, used as cattle run                               | -76.0                                | -10.7                                          |
| L15-1    | dec1       | acers, oaks, beeches, sparse firs, on partly pebbly, partly humus-rich floor    | -76.0                                | -10.7                                          |
| L15-2    | dec2       | birch- and oak-belt at spruce forest edge, grass layer, also used as cattle run | -76.0                                | -10.7                                          |
| L16      | dec        | oak forest, sparse birches and larches                                          | -73.0                                | -10.4                                          |

<sup>a</sup> Stumpp, C., Klaus, J., Stichler, W., 2014. Analysis of long-term stable isotopic composition in German precipitation. *Journal of Hydrology* 517, 351–361.  
<sup>b</sup> IAEA/WMO, 2018. Global Network of Isotopes in Precipitation. The GNIP Database, <https://nucleus.iaea.org/wiser>.  
<sup>c</sup> van Geldern, R., Baier, A., Subert, H.L., Kowol, S., Balk, L., Barth, J.A.C., 2014. (Table S1) Stable isotope composition of precipitation sampled at Erlangen, Germany between 2010 and 2013 for station GeoZentrum located at Erlangen city center, in: In Supplement to: Van Geldern, R et Al. (2014); Pleistocene Paleo-Groundwater as a Pristine Fresh Water Resource in Southern Germany – Evidence from Stable and Radiogenic Isotopes. *Science of the Total Environment*, 496, 107–115. <https://doi.org/10.1016/j.scitotenv.2014.06.016>.  
<sup>d</sup> Umweltbundesamt GmbH, 2018. Erhebung der Wassergüte in Österreich gemäß Hydrographengesetz i.d.F. des BGBl. Nr. 252/90 (gültig bis Dezember 2006) bzw. Gewässerzustandsüberwachung in Österreich gemäß Wasserrechtsgesetz, BGBl. I Nr. 123/06, i.d.F. v. BM/LfUW, Sektion IV / Abteilung 3 N, Öffentliche Qualitätsdaten-Abfrage.  
<sup>e</sup> Bowen, G.J., 2018. The Online Isotopes in Precipitation Calculator, version 3.1. <http://www.waterisotopes.org>.  
<sup>f</sup> IAEA/WMO, 2015. Global Network of Isotopes in Precipitation. The GNIP Database, <https://nucleus.iaea.org/wiser>.  
<sup>g</sup> Bowen, G.J., Revenaugh, J., 2003. Interpolating the isotopic composition of modern meteoric precipitation. *Water Resources Research* 39, 1–13.

50 Tab. S2. Climate station data.

| Location | Vegetation | Station ID | Name             | Latitude<br>(decimal °) | Longitude<br>(decimal °) | Altitude<br>(m) | Observation begin<br>(YYYYMMDD) | Observation end<br>(YYYYMMDD) | T <sub>min</sub><br>(°C) | T <sub>max</sub><br>(°C) | T <sub>min</sub><br>(°C) | Observation begin<br>(YYYYMMDD) | Observation end<br>(YYYYMMDD) | T <sub>min</sub><br>(°C) | Station ID | Name         | Latitude<br>(decimal °) |      |
|----------|------------|------------|------------------|-------------------------|--------------------------|-----------------|---------------------------------|-------------------------------|--------------------------|--------------------------|--------------------------|---------------------------------|-------------------------------|--------------------------|------------|--------------|-------------------------|------|
| L01      | con        | 3730       | Oberstdorf       | 47.40                   | 10.28                    | 806             | 19480101                        | 20171231                      | 6.5 <sup>A</sup>         | 11.5 <sup>A</sup>        | 14.2 <sup>A</sup>        | n.n.                            | n.n.                          | n.n.                     | n.n.       | n.n.         | n.n.                    |      |
| L01      | dec        | 3730       | Oberstdorf       | 47.40                   | 10.28                    | 806             | 19480101                        | 20171231                      | 6.5 <sup>A</sup>         | 11.5 <sup>A</sup>        | 14.2 <sup>A</sup>        | n.n.                            | n.n.                          | n.n.                     | n.n.       | n.n.         | n.n.                    |      |
| L02      | con        | 2290       | Hohenpeißenberg  | 47.80                   | 11.01                    | 977             | 19470101                        | 20171231                      | 7.0 <sup>A</sup>         | 11.4 <sup>A</sup>        | 12.7 <sup>A</sup>        | n.n.                            | n.n.                          | n.n.                     | n.n.       | n.n.         | n.n.                    |      |
| L03      | dec        | 2522       | Karlsruhe        | 49.04                   | 8.36                     | 112             | 19480101                        | 20081102                      | 10.5 <sup>A</sup>        | 15.3 <sup>A</sup>        | 17.8 <sup>A</sup>        | n.n.                            | n.n.                          | n.n.                     | n.n.       | n.n.         | n.n.                    |      |
| L03      | grass      | 2522       | Karlsruhe        | 49.04                   | 8.36                     | 112             | 19480101                        | 20081102                      | 10.5 <sup>A</sup>        | 15.3 <sup>A</sup>        | 17.8 <sup>A</sup>        | n.n.                            | n.n.                          | n.n.                     | n.n.       | n.n.         | n.n.                    |      |
| L04      | dec        | 3761       | Öhringen         | 49.21                   | 9.52                     | 276             | 19550101                        | 20171231                      | 9.6 <sup>A</sup>         | 14.4 <sup>A</sup>        | 16.8 <sup>A</sup>        | n.n.                            | n.n.                          | n.n.                     | n.n.       | n.n.         | n.n.                    |      |
| L04      | grass      | 3761       | Öhringen         | 49.21                   | 9.52                     | 276             | 19550101                        | 20171231                      | 9.6 <sup>A</sup>         | 14.4 <sup>A</sup>        | 16.8 <sup>A</sup>        | n.n.                            | n.n.                          | n.n.                     | n.n.       | n.n.         | n.n.                    |      |
| L05      | dec        | 5906       | Mannheim         | 49.51                   | 8.56                     | 98              | 19480101                        | 20171231                      | 10.6 <sup>A</sup>        | 15.4 <sup>A</sup>        | 17.9 <sup>A</sup>        | n.n.                            | n.n.                          | n.n.                     | n.n.       | n.n.         | n.n.                    |      |
| L06      | dec        | 3231       | Meiningen        | 50.56                   | 10.38                    | 450             | 19790101                        | 20171231                      | 7.8 <sup>A</sup>         | 12.7 <sup>A</sup>        | 14.7 <sup>A</sup>        | n.n.                            | n.n.                          | n.n.                     | n.n.       | n.n.         | n.n.                    |      |
| L06-1    | con1       | 3231       | Meiningen        | 50.56                   | 10.38                    | 450             | 19790101                        | 20171231                      | 7.8 <sup>A</sup>         | 12.7 <sup>A</sup>        | 14.7 <sup>A</sup>        | n.n.                            | n.n.                          | n.n.                     | n.n.       | n.n.         | n.n.                    |      |
| L06-2    | con2       | 3231       | Meiningen        | 50.56                   | 10.38                    | 450             | 19790101                        | 20171231                      | 7.8 <sup>A</sup>         | 12.7 <sup>A</sup>        | 14.7 <sup>A</sup>        | n.n.                            | n.n.                          | n.n.                     | n.n.       | n.n.         | n.n.                    |      |
| L07      | dec        | 2667       | Köln-Bonn        | 50.86                   | 7.16                     | 92              | 19600101                        | 20171231                      | 10.1 <sup>A</sup>        | 14.4 <sup>A</sup>        | 16.7 <sup>A</sup>        | n.n.                            | n.n.                          | n.n.                     | n.n.       | n.n.         | n.n.                    |      |
| L07      | grass      | 2667       | Köln-Bonn        | 50.86                   | 7.16                     | 92              | 19600101                        | 20171231                      | 10.1 <sup>A</sup>        | 14.4 <sup>A</sup>        | 16.7 <sup>A</sup>        | n.n.                            | n.n.                          | n.n.                     | n.n.       | n.n.         | n.n.                    |      |
| L08      | con        | 2483       | Kahler Asten     | 51.18                   | 8.49                     | 839             | 19510101                        | 20171231                      | 5.3 <sup>A</sup>         | 9.6 <sup>A</sup>         | 10.9 <sup>A</sup>        | n.n.                            | n.n.                          | n.n.                     | n.n.       | n.n.         | n.n.                    |      |
| L08      | dec        | 2483       | Kahler Asten     | 51.18                   | 8.49                     | 839             | 19510101                        | 20171231                      | 5.3 <sup>A</sup>         | 9.6 <sup>A</sup>         | 10.9 <sup>A</sup>        | n.n.                            | n.n.                          | n.n.                     | n.n.       | n.n.         | n.n.                    |      |
| L08      | grass      | 2483       | Kahler Asten     | 51.18                   | 8.49                     | 839             | 19510101                        | 20171231                      | 5.3 <sup>A</sup>         | 9.6 <sup>A</sup>         | 10.9 <sup>A</sup>        | n.n.                            | n.n.                          | n.n.                     | n.n.       | n.n.         | n.n.                    |      |
| L09      | dec        | 2014       | Hammover         | 52.46                   | 9.68                     | 55              | 19490101                        | 20171231                      | 9.2 <sup>A</sup>         | 13.7 <sup>A</sup>        | 15.9 <sup>A</sup>        | n.n.                            | n.n.                          | n.n.                     | n.n.       | n.n.         | n.n.                    |      |
| L09      | grass      | 2014       | Hammover         | 52.46                   | 9.68                     | 55              | 19490101                        | 20171231                      | 9.2 <sup>A</sup>         | 13.7 <sup>A</sup>        | 15.9 <sup>A</sup>        | n.n.                            | n.n.                          | n.n.                     | n.n.       | n.n.         | n.n.                    |      |
| L10      | dec        | 691        | Bremen           | 53.05                   | 8.80                     | 4               | 19490101                        | 20171231                      | 9.2 <sup>A</sup>         | 13.6 <sup>A</sup>        | 15.7 <sup>A</sup>        | n.n.                            | n.n.                          | n.n.                     | n.n.       | n.n.         | n.n.                    |      |
| L10      | grass      | 4466       | Schleswig        | 54.53                   | 9.55                     | 43              | 19510101                        | 20171231                      | 8.4 <sup>A</sup>         | 12.6 <sup>A</sup>        | 14.4 <sup>A</sup>        | n.n.                            | n.n.                          | n.n.                     | n.n.       | n.n.         | n.n.                    |      |
| L11      | con        | 4466       | Schleswig        | 54.53                   | 9.55                     | 43              | 19510101                        | 20171231                      | 8.4 <sup>A</sup>         | 12.6 <sup>A</sup>        | 14.4 <sup>A</sup>        | n.n.                            | n.n.                          | n.n.                     | n.n.       | n.n.         | n.n.                    |      |
| L11      | grass      | 4466       | Schleswig        | 54.53                   | 9.55                     | 43              | 19510101                        | 20171231                      | 8.4 <sup>A</sup>         | 12.6 <sup>A</sup>        | 14.4 <sup>A</sup>        | n.n.                            | n.n.                          | n.n.                     | n.n.       | n.n.         | n.n.                    |      |
| L12      | dec        | 06120      | Odense Lufthavn  | 55.48                   | 10.33                    | 15              | 19610101                        | 20001231                      | 8.3 <sup>CD</sup>        | 12.5 <sup>CD</sup>       | n.a.                     | n.n.                            | n.n.                          | n.n.                     | n.n.       | n.n.         | n.n.                    |      |
| L13      | con        | 30110      | Spodsbjerg       | 55.98                   | 11.85                    | 34              | 19610101                        | 19901231                      | 8.0 <sup>C</sup>         | 12.5 <sup>C</sup>        | n.a.                     | n.n.                            | n.n.                          | n.n.                     | n.n.       | n.n.         | n.n.                    |      |
| L13      | dec        | 30110      | Spodsbjerg       | 55.98                   | 11.85                    | 34              | 19610101                        | 19901231                      | 8.0 <sup>C</sup>         | 12.5 <sup>C</sup>        | n.a.                     | n.n.                            | n.n.                          | n.n.                     | n.n.       | n.n.         | n.n.                    |      |
| L14      | con        | 74180      | Hagshult Mo      | 57.29                   | 14.13                    | 169             | 19430101                        | 20180601                      | 5.8 <sup>F</sup>         | 10.8 <sup>F</sup>        | 14.5 <sup>F</sup>        | 19490101                        | 20180601                      | 14.5 <sup>F</sup>        | n.n.       | n.n.         | n.n.                    | n.n. |
| L15      | con        | 84580      | Snavlunda        | 58.97                   | 14.90                    | 144/140         | 19440101                        | 19830901                      | 5.4 <sup>F</sup>         | 10.8 <sup>F</sup>        | 13.9 <sup>F</sup>        | 19941014                        | 19830831                      | 13.9 <sup>F</sup>        | 85460      | Kettstaka A  | 58.72                   | n.n. |
| L15-1    | dec1       | 84580      | Snavlunda        | 58.97                   | 14.90                    | 144/140         | 19440101                        | 19830901                      | 5.4 <sup>F</sup>         | 10.8 <sup>F</sup>        | 13.9 <sup>F</sup>        | 19941014                        | 19830831                      | 13.9 <sup>F</sup>        | 85460      | Kettstaka A  | 58.72                   | n.n. |
| L15-2    | dec2       | 84580      | Snavlunda        | 58.97                   | 14.90                    | 144/140         | 19440101                        | 19830901                      | 5.4 <sup>F</sup>         | 10.8 <sup>F</sup>        | 13.9 <sup>F</sup>        | 19941014                        | 19830831                      | 13.9 <sup>F</sup>        | 85460      | Kettstaka A  | 58.72                   | n.n. |
| L16      | dec        | 85330      | Motala Kraftverk | 58.55                   | 15.08                    | 94              | 19340101                        | 19901228                      | 6.4 <sup>F</sup>         | 11.6 <sup>F</sup>        | 14.9 <sup>F</sup>        | 19610101                        | 19851024                      | 14.9 <sup>F</sup>        | 84310      | Karlsborg Mo | 58.51                   | n.n. |

n.n. = not needed/see information further left

n.a. = not available

<sup>A</sup> DWD Climate Data Center, 2018a. Historical hourly station observations of 2m air temperature and humidity for Germany, version v006.

<sup>B</sup> DWD Climate Data Center, 2018b. Historical annual precipitation observations for Germany, version v007.

<sup>C</sup> Laursen, E.V., Thomsen, R.S., Cappelen, J., 1999. Observed Air Temperature, Humidity, Pressure, Cloud Cover and Weather in Denmark - with Climatological Standard Normals, 1961-90.

<sup>D</sup> Cappelen, J., 2002. Danish Climatological Normals 1971-2000 - for selected stations.

<sup>E</sup> Frich, P., Rosenørn, S., Madsen, H., Jensen, J.J., 1997. Observed Precipitation in Denmark, 1961-90.

<sup>F</sup> Swedish Meteorological and Hydrological Institute, 2018. SMHI Open Data Meteorological Observations, <https://opendata-download-metobs.smhi.se/explore/>.

| Longitude<br>(decimal °) | Altitude<br>(m) | Observation begin<br>(YYYYMMDD) | Observation end<br>(YYYYMMDD) | RH <sub>min</sub><br>(%) | RH <sub>WV</sub><br>(%) | RH <sub>max</sub><br>(%) | RH <sub>min</sub><br>(%) | Name        | Latitude<br>(decimal °) | Longitude<br>(decimal °) | Altitude<br>(m) | Observation begin<br>(YYYYMMDD) | Observation end<br>(YYYYMMDD) | P <sub>max</sub><br>(mm) | Source |
|--------------------------|-----------------|---------------------------------|-------------------------------|--------------------------|-------------------------|--------------------------|--------------------------|-------------|-------------------------|--------------------------|-----------------|---------------------------------|-------------------------------|--------------------------|--------|
| n.n.                     | n.n.            | n.n.                            | n.n.                          | 82 <sup>A</sup>          | 80 <sup>A</sup>         | 70 <sup>A</sup>          | n.n.                     | n.n.        | n.n.                    | n.n.                     | n.n.            | n.n.                            | n.n.                          | 1769 <sup>B</sup>        | DWD    |
| n.n.                     | n.n.            | n.n.                            | n.n.                          | 82 <sup>A</sup>          | 80 <sup>A</sup>         | 70 <sup>A</sup>          | n.n.                     | n.n.        | n.n.                    | n.n.                     | n.n.            | n.n.                            | n.n.                          | 1769 <sup>B</sup>        | DWD    |
| n.n.                     | n.n.            | n.n.                            | n.n.                          | 78 <sup>A</sup>          | 77 <sup>A</sup>         | 73 <sup>A</sup>          | n.n.                     | n.n.        | n.n.                    | n.n.                     | n.n.            | n.n.                            | n.n.                          | 1173 <sup>B</sup>        | DWD    |
| n.n.                     | n.n.            | n.n.                            | n.n.                          | 77 <sup>A</sup>          | 73 <sup>A</sup>         | 63 <sup>A</sup>          | n.n.                     | n.n.        | n.n.                    | n.n.                     | n.n.            | n.n.                            | n.n.                          | 758 <sup>B</sup>         | DWD    |
| n.n.                     | n.n.            | n.n.                            | n.n.                          | 77 <sup>A</sup>          | 73 <sup>A</sup>         | 63 <sup>A</sup>          | n.n.                     | n.n.        | n.n.                    | n.n.                     | n.n.            | n.n.                            | n.n.                          | 758 <sup>B</sup>         | DWD    |
| n.n.                     | n.n.            | n.n.                            | n.n.                          | 77 <sup>A</sup>          | 74 <sup>A</sup>         | 65 <sup>A</sup>          | n.n.                     | n.n.        | n.n.                    | n.n.                     | n.n.            | n.n.                            | n.n.                          | 816 <sup>B</sup>         | DWD    |
| n.n.                     | n.n.            | n.n.                            | n.n.                          | 77 <sup>A</sup>          | 74 <sup>A</sup>         | 65 <sup>A</sup>          | n.n.                     | n.n.        | n.n.                    | n.n.                     | n.n.            | n.n.                            | n.n.                          | 816 <sup>B</sup>         | DWD    |
| n.n.                     | n.n.            | n.n.                            | n.n.                          | 75 <sup>A</sup>          | 71 <sup>A</sup>         | 61 <sup>A</sup>          | n.n.                     | n.n.        | n.n.                    | n.n.                     | n.n.            | n.n.                            | n.n.                          | 658 <sup>B</sup>         | DWD    |
| n.n.                     | n.n.            | n.n.                            | n.n.                          | 79 <sup>A</sup>          | 75 <sup>A</sup>         | 67 <sup>A</sup>          | n.n.                     | n.n.        | n.n.                    | n.n.                     | n.n.            | n.n.                            | n.n.                          | 660 <sup>B</sup>         | DWD    |
| n.n.                     | n.n.            | n.n.                            | n.n.                          | 79 <sup>A</sup>          | 75 <sup>A</sup>         | 67 <sup>A</sup>          | n.n.                     | n.n.        | n.n.                    | n.n.                     | n.n.            | n.n.                            | n.n.                          | 660 <sup>B</sup>         | DWD    |
| n.n.                     | n.n.            | n.n.                            | n.n.                          | 79 <sup>A</sup>          | 75 <sup>A</sup>         | 67 <sup>A</sup>          | n.n.                     | n.n.        | n.n.                    | n.n.                     | n.n.            | n.n.                            | n.n.                          | 660 <sup>B</sup>         | DWD    |
| n.n.                     | n.n.            | n.n.                            | n.n.                          | 77 <sup>A</sup>          | 74 <sup>A</sup>         | 65 <sup>A</sup>          | n.n.                     | n.n.        | n.n.                    | n.n.                     | n.n.            | n.n.                            | n.n.                          | 809 <sup>B</sup>         | DWD    |
| n.n.                     | n.n.            | n.n.                            | n.n.                          | 77 <sup>A</sup>          | 74 <sup>A</sup>         | 65 <sup>A</sup>          | n.n.                     | n.n.        | n.n.                    | n.n.                     | n.n.            | n.n.                            | n.n.                          | 809 <sup>B</sup>         | DWD    |
| n.n.                     | n.n.            | n.n.                            | n.n.                          | 87 <sup>A</sup>          | 84 <sup>A</sup>         | 78 <sup>A</sup>          | n.n.                     | n.n.        | n.n.                    | n.n.                     | n.n.            | n.n.                            | n.n.                          | 1417 <sup>B</sup>        | DWD    |
| n.n.                     | n.n.            | n.n.                            | n.n.                          | 87 <sup>A</sup>          | 84 <sup>A</sup>         | 78 <sup>A</sup>          | n.n.                     | n.n.        | n.n.                    | n.n.                     | n.n.            | n.n.                            | n.n.                          | 1417 <sup>B</sup>        | DWD    |
| n.n.                     | n.n.            | n.n.                            | n.n.                          | 87 <sup>A</sup>          | 84 <sup>A</sup>         | 78 <sup>A</sup>          | n.n.                     | n.n.        | n.n.                    | n.n.                     | n.n.            | n.n.                            | n.n.                          | 1417 <sup>B</sup>        | DWD    |
| n.n.                     | n.n.            | n.n.                            | n.n.                          | 80 <sup>A</sup>          | 76 <sup>A</sup>         | 68 <sup>A</sup>          | n.n.                     | n.n.        | n.n.                    | n.n.                     | n.n.            | n.n.                            | n.n.                          | 650 <sup>B</sup>         | DWD    |
| n.n.                     | n.n.            | n.n.                            | n.n.                          | 80 <sup>A</sup>          | 76 <sup>A</sup>         | 68 <sup>A</sup>          | n.n.                     | n.n.        | n.n.                    | n.n.                     | n.n.            | n.n.                            | n.n.                          | 650 <sup>B</sup>         | DWD    |
| n.n.                     | n.n.            | n.n.                            | n.n.                          | 80 <sup>A</sup>          | 77 <sup>A</sup>         | 69 <sup>A</sup>          | n.n.                     | n.n.        | n.n.                    | n.n.                     | n.n.            | n.n.                            | n.n.                          | 699 <sup>B</sup>         | DWD    |
| n.n.                     | n.n.            | n.n.                            | n.n.                          | 83 <sup>A</sup>          | 80 <sup>A</sup>         | 72 <sup>A</sup>          | n.n.                     | n.n.        | n.n.                    | n.n.                     | n.n.            | n.n.                            | n.n.                          | 900 <sup>B</sup>         | DWD    |
| n.n.                     | n.n.            | n.n.                            | n.n.                          | 83 <sup>A</sup>          | 80 <sup>A</sup>         | 72 <sup>A</sup>          | n.n.                     | n.n.        | n.n.                    | n.n.                     | n.n.            | n.n.                            | n.n.                          | 900 <sup>B</sup>         | DWD    |
| n.n.                     | n.n.            | 19971231                        | 19971231                      | 81 <sup>C</sup>          | 76 <sup>C</sup>         | 63 <sup>C</sup>          | n.n.                     | n.n.        | n.n.                    | n.n.                     | n.n.            | n.n.                            | n.n.                          | 572 <sup>E</sup>         | DWI    |
| n.n.                     | n.n.            | 19921231                        | 19921231                      | 84 <sup>C</sup>          | 80 <sup>C</sup>         | 74 <sup>C</sup>          | n.n.                     | n.n.        | n.n.                    | n.n.                     | n.n.            | n.n.                            | n.n.                          | 554 <sup>E</sup>         | DWI    |
| n.n.                     | n.n.            | 19690101                        | 19921231                      | 84 <sup>C</sup>          | 80 <sup>C</sup>         | 74 <sup>C</sup>          | n.n.                     | n.n.        | n.n.                    | n.n.                     | n.n.            | n.n.                            | n.n.                          | 554 <sup>E</sup>         | DWI    |
| n.n.                     | n.n.            | 20130101                        | 20180601                      | 86 <sup>F</sup>          | 79 <sup>F</sup>         | 68 <sup>F</sup>          | n.n.                     | n.n.        | n.n.                    | n.n.                     | 19430101        | 20180601                        | 20180601                      | 717 <sup>F</sup>         | SMHI   |
| 15.03                    | 225             | 19950801                        | 20180601                      | 82 <sup>F</sup>          | 75 <sup>F</sup>         | 68 <sup>F</sup>          | n.n.                     | Snavlunda D | 58.95/58.97/58.97       | 14.91/14.90/14.90        | 135/144/140     | 20150101                        | 20150101                      | 693 <sup>F</sup>         | SMHI   |
| 15.03                    | 225             | 19950801                        | 20180601                      | 82 <sup>F</sup>          | 75 <sup>F</sup>         | 68 <sup>F</sup>          | n.n.                     | Snavlunda D | 58.95/58.97/58.97       | 14.91/14.90/14.90        | 135/144/140     | 19440101                        | 20150101                      | 693 <sup>F</sup>         | SMHI   |
| 15.03                    | 225             | 19950801                        | 20180601                      | 82 <sup>F</sup>          | 75 <sup>F</sup>         | 68 <sup>F</sup>          | n.n.                     | Snavlunda D | 58.95/58.97/58.97       | 14.91/14.90/14.90        | 135/144/140     | 19440101                        | 20150101                      | 693 <sup>F</sup>         | SMHI   |
| 14.51                    | 95              | 20130101                        | 20180601                      | 83 <sup>F</sup>          | 78 <sup>F</sup>         | 71 <sup>F</sup>          | n.n.                     | Motala      | 58.56/58.55/58.55       | 15.02/15.01/15.08        | 95/95/94        | 19310101                        | 20180501                      | 557 <sup>F</sup>         | SMHI   |

52 **Tab. S3.** GDGT data. Crenarcheol and brGDGTs in  $\mu\text{g/g}$  dry weight.

| Location | Vegetation | pH (H <sub>2</sub> O) | Crenarcheol <sup>a</sup><br>(ng/g dry weight) | IIia <sup>a</sup><br>(ng/g dry weight) | IIib <sup>a</sup><br>(ng/g dry weight) | IIic <sup>a</sup><br>(ng/g dry weight) | IIa <sup>a</sup><br>(ng/g dry weight) | IIb <sup>a</sup><br>(ng/g dry weight) | IIc <sup>a</sup><br>(ng/g dry weight) | Ia <sup>a</sup><br>(ng/g dry weight) | Ib <sup>a</sup><br>(ng/g dry weight) | Ic <sup>a</sup><br>(ng/g dry weight) |
|----------|------------|-----------------------|-----------------------------------------------|----------------------------------------|----------------------------------------|----------------------------------------|---------------------------------------|---------------------------------------|---------------------------------------|--------------------------------------|--------------------------------------|--------------------------------------|
| L01      | con        | 4.5                   | 2                                             | 194                                    | 3                                      | 0                                      | 845                                   | 34                                    | 1                                     | 531                                  | 38                                   | 7                                    |
| L01      | dec        | 4.0                   | 1                                             | 109                                    | 1                                      | 0                                      | 536                                   | 7                                     | 3                                     | 687                                  | 37                                   | 10                                   |
| L02      | con        | 6.5                   | 38                                            | 128                                    | 9                                      | 1                                      | 329                                   | 81                                    | 4                                     | 160                                  | 86                                   | 79                                   |
| L03      | dec        | 4.3                   | 16                                            | 55                                     | 0                                      | 0                                      | 617                                   | 17                                    | 5                                     | 1289                                 | 30                                   | 9                                    |
| L03      | grass      | 5.2                   | 12                                            | 28                                     | 0                                      | 0                                      | 142                                   | 8                                     | 1                                     | 124                                  | 12                                   | 2                                    |
| L04      | dec        | 5.9                   | 13                                            | 60                                     | 4                                      | 1                                      | 185                                   | 37                                    | 3                                     | 137                                  | 33                                   | 6                                    |
| L04      | grass      | 6.0                   | 208                                           | 54                                     | 7                                      | 3                                      | 131                                   | 105                                   | 8                                     | 79                                   | 92                                   | 27                                   |
| L05      | dec        | 4.1                   | 15                                            | 25                                     | 0                                      | 0                                      | 204                                   | 2                                     | 1                                     | 380                                  | 5                                    | 1                                    |
| L06      | dec        | 7.3                   | 16                                            | 226                                    | 26                                     | 1                                      | 304                                   | 184                                   | 6                                     | 78                                   | 66                                   | 5                                    |
| L06-1    | con1       | 4.5                   | 2                                             | 116                                    | 0                                      | 0                                      | 585                                   | 18                                    | 2                                     | 549                                  | 21                                   | 1                                    |
| L06-2    | con2       | 6.0                   | 19                                            | 332                                    | 24                                     | 2                                      | 695                                   | 197                                   | 7                                     | 295                                  | 97                                   | 12                                   |
| L07      | dec        | 3.6                   | 149                                           | 67                                     | 1                                      | 1                                      | 506                                   | 10                                    | 4                                     | 677                                  | 16                                   | 5                                    |
| L07      | grass      | 4.2                   | 18                                            | 19                                     | 0                                      | 0                                      | 141                                   | 1                                     | 1                                     | 183                                  | 2                                    | 1                                    |
| L08      | con        | 3.3                   | 29                                            | 213                                    | 0                                      | 0                                      | 2265                                  | 26                                    | 19                                    | 3287                                 | 32                                   | 13                                   |
| L08      | dec        | 3.6                   | 11                                            | 84                                     | 0                                      | 0                                      | 821                                   | 12                                    | 5                                     | 1450                                 | 21                                   | 8                                    |
| L08      | grass      | 4.3                   | 0                                             | 232                                    | 0                                      | 0                                      | 996                                   | 11                                    | 2                                     | 884                                  | 21                                   | 6                                    |
| L09      | dec        | 3.6                   | 64                                            | 101                                    | 1                                      | 0                                      | 943                                   | 13                                    | 5                                     | 1513                                 | 19                                   | 8                                    |
| L09      | grass      | 4.3                   | 16                                            | 26                                     | 1                                      | 0                                      | 169                                   | 1                                     | 1                                     | 275                                  | 5                                    | 1                                    |
| L10      | dec        | 3.0                   | 1084                                          | 157                                    | 33                                     | 4                                      | 463                                   | 68                                    | 17                                    | 816                                  | 23                                   | 8                                    |
| L11      | con        | 3.5                   | 512                                           | 76                                     | 0                                      | 1                                      | 353                                   | 6                                     | 0                                     | 406                                  | 8                                    | 2                                    |
| L11      | grass      | 5.9                   | 19                                            | 89                                     | 0                                      | 0                                      | 579                                   | 26                                    | 2                                     | 714                                  | 44                                   | 5                                    |
| L12      | dec        | 4.9                   | 735                                           | 450                                    | 16                                     | 2                                      | 2219                                  | 418                                   | 36                                    | 1642                                 | 476                                  | 142                                  |
| L13      | con        | 3.2                   | 0                                             | 56                                     | 0                                      | 3                                      | 619                                   | 0                                     | 6                                     | 993                                  | 13                                   | 20                                   |
| L13      | dec        | 3.7                   | 0                                             | 150                                    | 0                                      | 0                                      | 1422                                  | 28                                    | 16                                    | 3165                                 | 46                                   | 19                                   |
| L14      | con        | 3.6                   | 0                                             | 103                                    | 2                                      | 0                                      | 1180                                  | 5                                     | 9                                     | 2077                                 | 17                                   | 4                                    |
| L15      | con        | 3.6                   | 0                                             | 207                                    | 3                                      | 1                                      | 2866                                  | 48                                    | 26                                    | 5695                                 | 98                                   | 35                                   |
| L15-1    | dec1       | 5.0                   | 7                                             | 192                                    | 2                                      | 0                                      | 933                                   | 41                                    | 4                                     | 658                                  | 58                                   | 22                                   |
| L15-2    | dec2       | 4.1                   | 5                                             | 210                                    | 1                                      | 0                                      | 1896                                  | 24                                    | 14                                    | 2541                                 | 41                                   | 13                                   |
| L16      | dec        | 4.3                   | 0                                             | 54                                     | 0                                      | 0                                      | 349                                   | 5                                     | 1                                     | 424                                  | 9                                    | 2                                    |

<sup>a</sup> structures can be found in Fig. S5

<sup>b</sup> BIT index was calculated according to Hopmans, E.C., Weijers, J.W.H., Scheffuß, E., Herfort, L., Sinninghe Damsté, J.S., Schouten, S., 2004. A novel proxy for terrestrial organic matter in sediments based on branched and isoprenoid tetraether lipids. *Earth and Planetary Science Letters* 224, 107–116.

<sup>c</sup> MBT, CBT, reconstructed T<sub>max</sub> and pHCBT according to Petersen, F., van der Meer, J., Schouten, S., Weijers, J.W.H., Flierer, N., Jackson, R.B., Kim, J.H., Sinninghe Damsté, J.S., 2012. Revised calibration of the MBT-CBT paleotemperature proxy based on branched tetraether membrane lipids in surface soils. *Geochimica et Cosmochimica Acta* 96, 215–229.



| brGDGT concentration<br>( $\mu\text{g/g}$ dry weight) | BIT  | MBT  | CBT | reconstructed $T_{\text{max}}$<br>( $^{\circ}\text{C}$ ) | pH <sub>car</sub> |
|-------------------------------------------------------|------|------|-----|----------------------------------------------------------|-------------------|
| 1.65                                                  | 1.00 | 0.35 | 1.3 | 4.3                                                      | 5.37              |
| 1.39                                                  | 1.00 | 0.53 | 1.4 | 9.0                                                      | 5.05              |
| 0.88                                                  | 0.94 | 0.37 | 0.5 | 9.8                                                      | 6.98              |
| 2.02                                                  | 0.99 | 0.66 | 1.6 | 12.1                                                     | 4.74              |
| 0.32                                                  | 0.96 | 0.43 | 1.1 | 7.9                                                      | 5.69              |
| 0.47                                                  | 0.97 | 0.38 | 0.7 | 8.9                                                      | 6.59              |
| 0.51                                                  | 0.56 | 0.40 | 0.0 | 13.0                                                     | 7.84              |
| 0.62                                                  | 0.98 | 0.63 | 2.0 | 9.0                                                      | 4.01              |
| 0.90                                                  | 0.97 | 0.17 | 0.2 | 5.1                                                      | 7.54              |
| 1.29                                                  | 1.00 | 0.44 | 1.5 | 6.3                                                      | 5.04              |
| 1.66                                                  | 0.99 | 0.25 | 0.5 | 5.5                                                      | 6.86              |
| 1.29                                                  | 0.89 | 0.54 | 1.7 | 8.2                                                      | 4.63              |
| 0.35                                                  | 0.95 | 0.53 | 2.0 | 5.9                                                      | 3.90              |
| 5.86                                                  | 1.00 | 0.57 | 2.0 | 7.2                                                      | 4.00              |
| 2.40                                                  | 1.00 | 0.62 | 1.8 | 9.4                                                      | 4.26              |
| 2.15                                                  | 1.00 | 0.42 | 1.8 | 3.8                                                      | 4.39              |
| 2.60                                                  | 0.98 | 0.59 | 1.9 | 8.5                                                      | 4.19              |
| 0.48                                                  | 0.97 | 0.59 | 1.9 | 8.5                                                      | 4.23              |
| 1.59                                                  | 0.57 | 0.55 | 1.2 | 11.2                                                     | 5.63              |
| 0.85                                                  | 0.62 | 0.49 | 1.7 | 6.2                                                      | 4.50              |
| 1.46                                                  | 0.99 | 0.52 | 1.3 | 9.8                                                      | 5.40              |
| 5.40                                                  | 0.85 | 0.42 | 0.6 | 10.2                                                     | 6.65              |
| 1.71                                                  | 1.00 | 0.60 | 2.1 | 7.6                                                      | 3.78              |
| 4.85                                                  | 1.00 | 0.67 | 1.8 | 11.3                                                     | 4.37              |
| 3.40                                                  | 1.00 | 0.62 | 2.2 | 7.7                                                      | 3.64              |
| 8.98                                                  | 1.00 | 0.65 | 1.8 | 10.9                                                     | 4.42              |
| 1.91                                                  | 1.00 | 0.39 | 1.2 | 6.0                                                      | 5.52              |
| 4.74                                                  | 1.00 | 0.55 | 1.8 | 7.4                                                      | 4.29              |
| 0.84                                                  | 1.00 | 0.52 | 1.7 | 6.9                                                      | 4.46              |

54 **Tab. S4.** Measured *n*-alkane  $\delta^2\text{H}$  and sugar  $\delta^{18}\text{O}$  data along with calculations and reconstruction  
 55 results.

| Location | Vegetation | <i>n</i> -alkane $\delta^2\text{H}$ (‰) | sugar $\delta^{18}\text{O}$ (‰) | $\epsilon_{n\text{-alkane/precipitation}}$ (‰) | $\epsilon_{\text{sugar/precipitation}}$ (‰) | reconstructed $\delta^2\text{H}_{\text{source-water}}$ (‰) | reconstructed $\delta^{18}\text{O}_{\text{source-water}}$ (‰) | reconstructed RH <sub>MDV</sub> (%) |
|----------|------------|-----------------------------------------|---------------------------------|------------------------------------------------|---------------------------------------------|------------------------------------------------------------|---------------------------------------------------------------|-------------------------------------|
| L01      | con        | -216.2                                  | 34.17                           | -149                                           | 45.5                                        | -139                                                       | -18.7                                                         | 34                                  |
| L01      | dec        | -190.6                                  | 35.95                           | -121                                           | 47.3                                        | -100                                                       | -13.8                                                         | 42                                  |
| L02      | con        | -169.4                                  | 32.95                           | -103                                           | 43.7                                        | -49                                                        | -7.3                                                          | 66                                  |
| L03      | dec        | -176.8                                  | 34.54                           | -127                                           | 42.8                                        | -67                                                        | -9.6                                                          | 56                                  |
| L03      | grass      | n.a.                                    | 29.96                           | n.a.                                           | 38.1                                        | n.a.                                                       | n.a.                                                          | n.a.                                |
| L04      | dec        | n.a.                                    | 35.30                           | n.a.                                           | 43.7                                        | n.a.                                                       | n.a.                                                          | n.a.                                |
| L04      | grass      | -208.6                                  | 30.80                           | -160                                           | 39.2                                        | -110                                                       | -14.9                                                         | 52                                  |
| L05      | dec        | -169.6                                  | 32.95                           | -121                                           | 41.1                                        | -47                                                        | -7.1                                                          | 66                                  |
| L06      | dec        | n.a.                                    | 34.30                           | n.a.                                           | 43.9                                        | n.a.                                                       | n.a.                                                          | n.a.                                |
| L06-1    | con1       | -201.5                                  | 34.27                           | -146                                           | 43.9                                        | -113                                                       | -15.3                                                         | 42                                  |
| L06-2    | con2       | -191.0                                  | 34.39                           | -135                                           | 44.0                                        | -94                                                        | -13.0                                                         | 48                                  |
| L07      | dec        | -170.4                                  | 36.07                           | -124                                           | 43.8                                        | -62                                                        | -9.0                                                          | 54                                  |
| L07      | grass      | n.a.                                    | 31.28                           | n.a.                                           | 39.2                                        | n.a.                                                       | n.a.                                                          | n.a.                                |
| L08      | con        | -168.3                                  | 38.42                           | -113                                           | 48.1                                        | -72                                                        | -10.2                                                         | 45                                  |
| L08      | dec        | -156.3                                  | 36.19                           | -101                                           | 45.8                                        | -40                                                        | -6.2                                                          | 61                                  |
| L08      | grass      | -184.2                                  | 31.51                           | -130                                           | 41.1                                        | -71                                                        | -10.1                                                         | 63                                  |
| L09      | dec        | -177.8                                  | 31.66                           | -129                                           | 39.8                                        | -57                                                        | -8.4                                                          | 66                                  |
| L09      | grass      | -191.6                                  | 28.30                           | -144                                           | 36.4                                        | -69                                                        | -9.8                                                          | 71                                  |
| L10      | dec        | -171.6                                  | 39.45                           | -126                                           | 47.3                                        | -79                                                        | -11.1                                                         | 40                                  |
| L11      | con        | -183.6                                  | 33.56                           | -135                                           | 41.8                                        | -77                                                        | -10.8                                                         | 55                                  |
| L11      | grass      | -194.1                                  | 27.67                           | -146                                           | 35.8                                        | -71                                                        | -10.1                                                         | 72                                  |
| L12      | dec        | -177.4                                  | 37.30                           | -124                                           | 46.4                                        | -83                                                        | -11.6                                                         | 44                                  |
| L13      | con        | -182.9                                  | 36.62                           | -124                                           | 46.6                                        | -90                                                        | -12.5                                                         | 44                                  |
| L13      | dec        | -183.8                                  | 28.79                           | -125                                           | 38.7                                        | -57                                                        | -8.4                                                          | 74                                  |
| L14      | con        | -190.3                                  | 36.85                           | -128                                           | 47.4                                        | -103                                                       | -14.1                                                         | 39                                  |
| L15      | con        | -201.1                                  | 32.13                           | -135                                           | 43.3                                        | -103                                                       | -14.1                                                         | 51                                  |
| L15-1    | dec1       | -201.6                                  | 33.41                           | -136                                           | 44.6                                        | -110                                                       | -15.0                                                         | 45                                  |
| L15-2    | dec2       | -209.7                                  | 33.05                           | -145                                           | 44.2                                        | -123                                                       | -16.6                                                         | 42                                  |
| L16      | dec        | -191.6                                  | 28.41                           | -128                                           | 39.2                                        | -69                                                        | -9.9                                                          | 71                                  |

n.a. = not available
